# Supplementary material
Source: ML conference proceedings conference paper supplement (https://proceedings.neurips.cc/paper_files/paper/2022/hash/0207c9ea9faf66c6e892c3fa3c167b75-Abstract.html)
Supplement: Supplementary file 1 [file 0207c9ea9faf66c6e892c3fa3c167b75-Supplemental-Conference.zip]

Archive with 466 entries (421 files):
- CHIMLE_supplementary_materials/
- __MACOSX/._CHIMLE_supplementary_materials
- CHIMLE_supplementary_materials/CHIMLE_supplementary_materials.pdf
- __MACOSX/CHIMLE_supplementary_materials/._CHIMLE_supplementary_materials.pdf
- CHIMLE_supplementary_materials/.DS_Store
- __MACOSX/CHIMLE_supplementary_materials/._.DS_Store
- CHIMLE_supplementary_materials/website/
- __MACOSX/CHIMLE_supplementary_materials/._website
- CHIMLE_supplementary_materials/Results.html
- __MACOSX/CHIMLE_supplementary_materials/._Results.html
- CHIMLE_supplementary_materials/website/imle.mp4
- __MACOSX/CHIMLE_supplementary_materials/website/._imle.mp4
- CHIMLE_supplementary_materials/website/.DS_Store
- __MACOSX/CHIMLE_supplementary_materials/website/._.DS_Store
- CHIMLE_supplementary_materials/website/github.jpg
- CHIMLE_supplementary_materials/website/index.css
- CHIMLE_supplementary_materials/website/gan.mp4
- __MACOSX/CHIMLE_supplementary_materials/website/._gan.mp4
- CHIMLE_supplementary_materials/website/samples/
- __MACOSX/CHIMLE_supplementary_materials/website/._samples
- CHIMLE_supplementary_materials/website/GAN_alg.mp4
- __MACOSX/CHIMLE_supplementary_materials/website/._GAN_alg.mp4
- CHIMLE_supplementary_materials/website/paper_icon.jpg
- CHIMLE_supplementary_materials/website/i.mp4
- __MACOSX/CHIMLE_supplementary_materials/website/._i.mp4
- CHIMLE_supplementary_materials/website/stable.mp4
- __MACOSX/CHIMLE_supplementary_materials/website/._stable.mp4
- CHIMLE_supplementary_materials/website/samples/Decompression/
- __MACOSX/CHIMLE_supplementary_materials/website/samples/._Decompression
- CHIMLE_supplementary_materials/website/samples/.DS_Store
- __MACOSX/CHIMLE_supplementary_materials/website/samples/._.DS_Store
- CHIMLE_supplementary_materials/website/samples/Night2Day/
- __MACOSX/CHIMLE_supplementary_materials/website/samples/._Night2Day
- CHIMLE_supplementary_materials/website/samples/SR/
- __MACOSX/CHIMLE_supplementary_materials/website/samples/._SR
- CHIMLE_supplementary_materials/website/samples/Colorization/
- __MACOSX/CHIMLE_supplementary_materials/website/samples/._Colorization
- CHIMLE_supplementary_materials/website/samples/Decompression/ddrm/
- __MACOSX/CHIMLE_supplementary_materials/website/samples/Decompression/._ddrm
- CHIMLE_supplementary_materials/website/samples/Decompression/msgan/
- __MACOSX/CHIMLE_supplementary_materials/website/samples/Decompression/._msgan
- CHIMLE_supplementary_materials/website/samples/Decompression/.DS_Store
- __MACOSX/CHIMLE_supplementary_materials/website/samples/Decompression/._.DS_Store
- CHIMLE_supplementary_materials/website/samples/Decompression/monce/
- __MACOSX/CHIMLE_supplementary_materials/website/samples/Decompression/._monce
- CHIMLE_supplementary_materials/website/samples/Decompression/CHIMLE/
- __MACOSX/CHIMLE_supplementary_materials/website/samples/Decompression/._CHIMLE
- CHIMLE_supplementary_materials/website/samples/Decompression/Input/
- __MACOSX/CHIMLE_supplementary_materials/website/samples/Decompression/._Input
- CHIMLE_supplementary_materials/website/samples/Decompression/ndm/
- __MACOSX/CHIMLE_supplementary_materials/website/samples/Decompression/._ndm
- CHIMLE_supplementary_materials/website/samples/Decompression/DnCNN/
- __MACOSX/CHIMLE_supplementary_materials/website/samples/Decompression/._DnCNN
- CHIMLE_supplementary_materials/website/samples/Decompression/bicyclegan/
- __MACOSX/CHIMLE_supplementary_materials/website/samples/Decompression/._bicyclegan
- CHIMLE_supplementary_materials/website/samples/Decompression/divco/
- __MACOSX/CHIMLE_supplementary_materials/website/samples/Decompression/._divco
- CHIMLE_supplementary_materials/website/samples/Decompression/cIMLE/
- __MACOSX/CHIMLE_supplementary_materials/website/samples/Decompression/._cIMLE
- CHIMLE_supplementary_materials/website/samples/Night2Day/msgan/
- __MACOSX/CHIMLE_supplementary_materials/website/samples/Night2Day/._msgan
- CHIMLE_supplementary_materials/website/samples/Night2Day/.DS_Store
- __MACOSX/CHIMLE_supplementary_materials/website/samples/Night2Day/._.DS_Store
- CHIMLE_supplementary_materials/website/samples/Night2Day/monce/
- __MACOSX/CHIMLE_supplementary_materials/website/samples/Night2Day/._monce
- CHIMLE_supplementary_materials/website/samples/Night2Day/CHIMLE/
- __MACOSX/CHIMLE_supplementary_materials/website/samples/Night2Day/._CHIMLE
- CHIMLE_supplementary_materials/website/samples/Night2Day/Input/
- __MACOSX/CHIMLE_supplementary_materials/website/samples/Night2Day/._Input
- CHIMLE_supplementary_materials/website/samples/Night2Day/ndm/
- __MACOSX/CHIMLE_supplementary_materials/website/samples/Night2Day/._ndm
- CHIMLE_supplementary_materials/website/samples/Night2Day/bicyclegan/
- __MACOSX/CHIMLE_supplementary_materials/website/samples/Night2Day/._bicyclegan
- CHIMLE_supplementary_materials/website/samples/Night2Day/divco/
- __MACOSX/CHIMLE_supplementary_materials/website/samples/Night2Day/._divco
- CHIMLE_supplementary_materials/website/samples/Night2Day/cIMLE/
- __MACOSX/CHIMLE_supplementary_materials/website/samples/Night2Day/._cIMLE
- CHIMLE_supplementary_materials/website/samples/SR/ddrm/
- __MACOSX/CHIMLE_supplementary_materials/website/samples/SR/._ddrm
- CHIMLE_supplementary_materials/website/samples/SR/msgan/
- __MACOSX/CHIMLE_supplementary_materials/website/samples/SR/._msgan
- CHIMLE_supplementary_materials/website/samples/SR/rfb-esrgan/
- __MACOSX/CHIMLE_supplementary_materials/website/samples/SR/._rfb-esrgan
- CHIMLE_supplementary_materials/website/samples/SR/.DS_Store
- __MACOSX/CHIMLE_supplementary_materials/website/samples/SR/._.DS_Store
- CHIMLE_supplementary_materials/website/samples/SR/monce/
- __MACOSX/CHIMLE_supplementary_materials/website/samples/SR/._monce
- CHIMLE_supplementary_materials/website/samples/SR/CHIMLE/
- __MACOSX/CHIMLE_supplementary_materials/website/samples/SR/._CHIMLE
- CHIMLE_supplementary_materials/website/samples/SR/Input/
- __MACOSX/CHIMLE_supplementary_materials/website/samples/SR/._Input
- CHIMLE_supplementary_materials/website/samples/SR/ndm/
- __MACOSX/CHIMLE_supplementary_materials/website/samples/SR/._ndm
- CHIMLE_supplementary_materials/website/samples/SR/bicyclegan/
- __MACOSX/CHIMLE_supplementary_materials/website/samples/SR/._bicyclegan
- CHIMLE_supplementary_materials/website/samples/SR/divco/
- __MACOSX/CHIMLE_supplementary_materials/website/samples/SR/._divco
- CHIMLE_supplementary_materials/website/samples/SR/cIMLE/
- __MACOSX/CHIMLE_supplementary_materials/website/samples/SR/._cIMLE
- CHIMLE_supplementary_materials/website/samples/Colorization/ddrm/
- __MACOSX/CHIMLE_supplementary_materials/website/samples/Colorization/._ddrm
- CHIMLE_supplementary_materials/website/samples/Colorization/msgan/
- __MACOSX/CHIMLE_supplementary_materials/website/samples/Colorization/._msgan
- CHIMLE_supplementary_materials/website/samples/Colorization/.DS_Store
- __MACOSX/CHIMLE_supplementary_materials/website/samples/Colorization/._.DS_Store
- CHIMLE_supplementary_materials/website/samples/Colorization/monce/
- __MACOSX/CHIMLE_supplementary_materials/website/samples/Colorization/._monce
- CHIMLE_supplementary_materials/website/samples/Colorization/CHIMLE/
- __MACOSX/CHIMLE_supplementary_materials/website/samples/Colorization/._CHIMLE
- CHIMLE_supplementary_materials/website/samples/Colorization/Input/
- __MACOSX/CHIMLE_supplementary_materials/website/samples/Colorization/._Input
- CHIMLE_supplementary_materials/website/samples/Colorization/ndm/
- __MACOSX/CHIMLE_supplementary_materials/website/samples/Colorization/._ndm
- CHIMLE_supplementary_materials/website/samples/Colorization/bicyclegan/
- __MACOSX/CHIMLE_supplementary_materials/website/samples/Colorization/._bicyclegan
- CHIMLE_supplementary_materials/website/samples/Colorization/instcolorization/
- __MACOSX/CHIMLE_supplementary_materials/website/samples/Colorization/._instcolorization
- CHIMLE_supplementary_materials/website/samples/Colorization/divco/
- __MACOSX/CHIMLE_supplementary_materials/website/samples/Colorization/._divco
- CHIMLE_supplementary_materials/website/samples/Colorization/cIMLE/
- __MACOSX/CHIMLE_supplementary_materials/website/samples/Colorization/._cIMLE
- CHIMLE_supplementary_materials/website/samples/Decompression/ddrm/inp4.mp4
- __MACOSX/CHIMLE_supplementary_materials/website/samples/Decompression/ddrm/._inp4.mp4
- CHIMLE_supplementary_materials/website/samples/Decompression/ddrm/inp1.mp4
- __MACOSX/CHIMLE_supplementary_materials/website/samples/Decompression/ddrm/._inp1.mp4
- CHIMLE_supplementary_materials/website/samples/Decompression/ddrm/inp2.mp4
- __MACOSX/CHIMLE_supplementary_materials/website/samples/Decompression/ddrm/._inp2.mp4
- CHIMLE_supplementary_materials/website/samples/Decompression/ddrm/inp3.mp4
- __MACOSX/CHIMLE_supplementary_materials/website/samples/Decompression/ddrm/._inp3.mp4
- CHIMLE_supplementary_materials/website/samples/Decompression/msgan/inp4.mp4
- __MACOSX/CHIMLE_supplementary_materials/website/samples/Decompression/msgan/._inp4.mp4
- CHIMLE_supplementary_materials/website/samples/Decompression/msgan/inp1.mp4
- __MACOSX/CHIMLE_supplementary_materials/website/samples/Decompression/msgan/._inp1.mp4
- CHIMLE_supplementary_materials/website/samples/Decompression/msgan/inp2.mp4
- __MACOSX/CHIMLE_supplementary_materials/website/samples/Decompression/msgan/._inp2.mp4
- CHIMLE_supplementary_materials/website/samples/Decompression/msgan/inp3.mp4
- __MACOSX/CHIMLE_supplementary_materials/website/samples/Decompression/msgan/._inp3.mp4
- CHIMLE_supplementary_materials/website/samples/Decompression/monce/inp4.mp4
- __MACOSX/CHIMLE_supplementary_materials/website/samples/Decompression/monce/._inp4.mp4
- CHIMLE_supplementary_materials/website/samples/Decompression/monce/inp1.mp4
- __MACOSX/CHIMLE_supplementary_materials/website/samples/Decompression/monce/._inp1.mp4
- CHIMLE_supplementary_materials/website/samples/Decompression/monce/inp2.mp4
- __MACOSX/CHIMLE_supplementary_materials/website/samples/Decompression/monce/._inp2.mp4
- CHIMLE_supplementary_materials/website/samples/Decompression/monce/inp3.mp4
- __MACOSX/CHIMLE_supplementary_materials/website/samples/Decompression/monce/._inp3.mp4
- CHIMLE_supplementary_materials/website/samples/Decompression/CHIMLE/.DS_Store
- __MACOSX/CHIMLE_supplementary_materials/website/samples/Decompression/CHIMLE/._.DS_Store
- CHIMLE_supplementary_materials/website/samples/Decompression/CHIMLE/inp4.mp4
- CHIMLE_supplementary_materials/website/samples/Decompression/CHIMLE/inp1.mp4
- CHIMLE_supplementary_materials/website/samples/Decompression/CHIMLE/inp2.mp4
- CHIMLE_supplementary_materials/website/samples/Decompression/CHIMLE/inp3.mp4
- CHIMLE_supplementary_materials/website/samples/Decompression/Input/.DS_Store
- __MACOSX/CHIMLE_supplementary_materials/website/samples/Decompression/Input/._.DS_Store
- CHIMLE_supplementary_materials/website/samples/Decompression/Input/inp4.mp4
- CHIMLE_supplementary_materials/website/samples/Decompression/Input/inp1.mp4
- CHIMLE_supplementary_materials/website/samples/Decompression/Input/inp2.mp4
- CHIMLE_supplementary_materials/website/samples/Decompression/Input/inp3.mp4
- CHIMLE_supplementary_materials/website/samples/Decompression/ndm/inp4.mp4
- CHIMLE_supplementary_materials/website/samples/Decompression/ndm/inp1.mp4
- CHIMLE_supplementary_materials/website/samples/Decompression/ndm/inp2.mp4
- __MACOSX/CHIMLE_supplementary_materials/website/samples/Decompression/ndm/._inp2.mp4
- CHIMLE_supplementary_materials/website/samples/Decompression/ndm/inp3.mp4
- CHIMLE_supplementary_materials/website/samples/Decompression/DnCNN/.DS_Store
- __MACOSX/CHIMLE_supplementary_materials/website/samples/Decompression/DnCNN/._.DS_Store
- CHIMLE_supplementary_materials/website/samples/Decompression/DnCNN/inp4.mp4
- CHIMLE_supplementary_materials/website/samples/Decompression/DnCNN/inp1.mp4
- CHIMLE_supplementary_materials/website/samples/Decompression/DnCNN/inp2.mp4
- CHIMLE_supplementary_materials/website/samples/Decompression/DnCNN/inp3.mp4
- CHIMLE_supplementary_materials/website/samples/Decompression/bicyclegan/.DS_Store
- __MACOSX/CHIMLE_supplementary_materials/website/samples/Decompression/bicyclegan/._.DS_Store
- CHIMLE_supplementary_materials/website/samples/Decompression/bicyclegan/inp4.mp4
- __MACOSX/CHIMLE_supplementary_materials/website/samples/Decompression/bicyclegan/._inp4.mp4
- CHIMLE_supplementary_materials/website/samples/Decompression/bicyclegan/inp1.mp4
- __MACOSX/CHIMLE_supplementary_materials/website/samples/Decompression/bicyclegan/._inp1.mp4
- CHIMLE_supplementary_materials/website/samples/Decompression/bicyclegan/inp2.mp4
- __MACOSX/CHIMLE_supplementary_materials/website/samples/Decompression/bicyclegan/._inp2.mp4
- CHIMLE_supplementary_materials/website/samples/Decompression/bicyclegan/inp3.mp4
- __MACOSX/CHIMLE_supplementary_materials/website/samples/Decompression/bicyclegan/._inp3.mp4
- CHIMLE_supplementary_materials/website/samples/Decompression/divco/inp4.mp4
- __MACOSX/CHIMLE_supplementary_materials/website/samples/Decompression/divco/._inp4.mp4
- CHIMLE_supplementary_materials/website/samples/Decompression/divco/inp1.mp4
- __MACOSX/CHIMLE_supplementary_materials/website/samples/Decompression/divco/._inp1.mp4
- CHIMLE_supplementary_materials/website/samples/Decompression/divco/inp2.mp4
- __MACOSX/CHIMLE_supplementary_materials/website/samples/Decompression/divco/._inp2.mp4
- CHIMLE_supplementary_materials/website/samples/Decompression/divco/inp3.mp4
- __MACOSX/CHIMLE_supplementary_materials/website/samples/Decompression/divco/._inp3.mp4
- CHIMLE_supplementary_materials/website/samples/Decompression/cIMLE/.DS_Store
- __MACOSX/CHIMLE_supplementary_materials/website/samples/Decompression/cIMLE/._.DS_Store
- CHIMLE_supplementary_materials/website/samples/Decompression/cIMLE/inp4.mp4
- CHIMLE_supplementary_materials/website/samples/Decompression/cIMLE/inp1.mp4
- CHIMLE_supplementary_materials/website/samples/Decompression/cIMLE/inp2.mp4
- CHIMLE_supplementary_materials/website/samples/Decompression/cIMLE/inp3.mp4
- CHIMLE_supplementary_materials/website/samples/Night2Day/msgan/inp4.mp4
- __MACOSX/CHIMLE_supplementary_materials/website/samples/Night2Day/msgan/._inp4.mp4
- CHIMLE_supplementary_materials/website/samples/Night2Day/msgan/inp1.mp4
- __MACOSX/CHIMLE_supplementary_materials/website/samples/Night2Day/msgan/._inp1.mp4
- CHIMLE_supplementary_materials/website/samples/Night2Day/msgan/inp2.mp4
- __MACOSX/CHIMLE_supplementary_materials/website/samples/Night2Day/msgan/._inp2.mp4
- CHIMLE_supplementary_materials/website/samples/Night2Day/msgan/inp3.mp4
- __MACOSX/CHIMLE_supplementary_materials/website/samples/Night2Day/msgan/._inp3.mp4
- CHIMLE_supplementary_materials/website/samples/Night2Day/monce/inp4.mp4
- __MACOSX/CHIMLE_supplementary_materials/website/samples/Night2Day/monce/._inp4.mp4
- CHIMLE_supplementary_materials/website/samples/Night2Day/monce/inp1.mp4
- __MACOSX/CHIMLE_supplementary_materials/website/samples/Night2Day/monce/._inp1.mp4
- CHIMLE_supplementary_materials/website/samples/Night2Day/monce/inp2.mp4
- __MACOSX/CHIMLE_supplementary_materials/website/samples/Night2Day/monce/._inp2.mp4
- CHIMLE_supplementary_materials/website/samples/Night2Day/monce/inp3.mp4
- __MACOSX/CHIMLE_supplementary_materials/website/samples/Night2Day/monce/._inp3.mp4
- CHIMLE_supplementary_materials/website/samples/Night2Day/CHIMLE/.DS_Store
- __MACOSX/CHIMLE_supplementary_materials/website/samples/Night2Day/CHIMLE/._.DS_Store
- CHIMLE_supplementary_materials/website/samples/Night2Day/CHIMLE/inp4.mp4
- __MACOSX/CHIMLE_supplementary_materials/website/samples/Night2Day/CHIMLE/._inp4.mp4
- CHIMLE_supplementary_materials/website/samples/Night2Day/CHIMLE/inp1.mp4
- __MACOSX/CHIMLE_supplementary_materials/website/samples/Night2Day/CHIMLE/._inp1.mp4
- CHIMLE_supplementary_materials/website/samples/Night2Day/CHIMLE/inp2.mp4
- __MACOSX/CHIMLE_supplementary_materials/website/samples/Night2Day/CHIMLE/._inp2.mp4
- CHIMLE_supplementary_materials/website/samples/Night2Day/CHIMLE/inp3.mp4
- __MACOSX/CHIMLE_supplementary_materials/website/samples/Night2Day/CHIMLE/._inp3.mp4
- CHIMLE_supplementary_materials/website/samples/Night2Day/Input/.DS_Store
- __MACOSX/CHIMLE_supplementary_materials/website/samples/Night2Day/Input/._.DS_Store
- CHIMLE_supplementary_materials/website/samples/Night2Day/Input/inp4.mp4
- __MACOSX/CHIMLE_supplementary_materials/website/samples/Night2Day/Input/._inp4.mp4
- CHIMLE_supplementary_materials/website/samples/Night2Day/Input/inp1.mp4
- __MACOSX/CHIMLE_supplementary_materials/website/samples/Night2Day/Input/._inp1.mp4
- CHIMLE_supplementary_materials/website/samples/Night2Day/Input/inp2.mp4
- __MACOSX/CHIMLE_supplementary_materials/website/samples/Night2Day/Input/._inp2.mp4
- CHIMLE_supplementary_materials/website/samples/Night2Day/Input/inp3.mp4
- __MACOSX/CHIMLE_supplementary_materials/website/samples/Night2Day/Input/._inp3.mp4
- CHIMLE_supplementary_materials/website/samples/Night2Day/ndm/.DS_Store
- __MACOSX/CHIMLE_supplementary_materials/website/samples/Night2Day/ndm/._.DS_Store
- CHIMLE_supplementary_materials/website/samples/Night2Day/ndm/inp4.mp4
- CHIMLE_supplementary_materials/website/samples/Night2Day/ndm/inp1.mp4
- CHIMLE_supplementary_materials/website/samples/Night2Day/ndm/inp2.mp4
- CHIMLE_supplementary_materials/website/samples/Night2Day/ndm/inp3.mp4
- CHIMLE_supplementary_materials/website/samples/Night2Day/bicyclegan/inp4.mp4
- __MACOSX/CHIMLE_supplementary_materials/website/samples/Night2Day/bicyclegan/._inp4.mp4
- CHIMLE_supplementary_materials/website/samples/Night2Day/bicyclegan/inp1.mp4
- __MACOSX/CHIMLE_supplementary_materials/website/samples/Night2Day/bicyclegan/._inp1.mp4
- CHIMLE_supplementary_materials/website/samples/Night2Day/bicyclegan/inp2.mp4
- __MACOSX/CHIMLE_supplementary_materials/website/samples/Night2Day/bicyclegan/._inp2.mp4
- CHIMLE_supplementary_materials/website/samples/Night2Day/bicyclegan/inp3.mp4
- __MACOSX/CHIMLE_supplementary_materials/website/samples/Night2Day/bicyclegan/._inp3.mp4
- CHIMLE_supplementary_materials/website/samples/Night2Day/divco/inp4.mp4
- __MACOSX/CHIMLE_supplementary_materials/website/samples/Night2Day/divco/._inp4.mp4
- CHIMLE_supplementary_materials/website/samples/Night2Day/divco/inp1.mp4
- __MACOSX/CHIMLE_supplementary_materials/website/samples/Night2Day/divco/._inp1.mp4
- CHIMLE_supplementary_materials/website/samples/Night2Day/divco/inp2.mp4
- __MACOSX/CHIMLE_supplementary_materials/website/samples/Night2Day/divco/._inp2.mp4
- CHIMLE_supplementary_materials/website/samples/Night2Day/divco/inp3.mp4
- __MACOSX/CHIMLE_supplementary_materials/website/samples/Night2Day/divco/._inp3.mp4
- CHIMLE_supplementary_materials/website/samples/Night2Day/cIMLE/.DS_Store
- __MACOSX/CHIMLE_supplementary_materials/website/samples/Night2Day/cIMLE/._.DS_Store
- CHIMLE_supplementary_materials/website/samples/Night2Day/cIMLE/inp4.mp4
- __MACOSX/CHIMLE_supplementary_materials/website/samples/Night2Day/cIMLE/._inp4.mp4
- CHIMLE_supplementary_materials/website/samples/Night2Day/cIMLE/inp1.mp4
- __MACOSX/CHIMLE_supplementary_materials/website/samples/Night2Day/cIMLE/._inp1.mp4
- CHIMLE_supplementary_materials/website/samples/Night2Day/cIMLE/inp2.mp4
- __MACOSX/CHIMLE_supplementary_materials/website/samples/Night2Day/cIMLE/._inp2.mp4
- CHIMLE_supplementary_materials/website/samples/Night2Day/cIMLE/inp3.mp4
- __MACOSX/CHIMLE_supplementary_materials/website/samples/Night2Day/cIMLE/._inp3.mp4
- CHIMLE_supplementary_materials/website/samples/SR/ddrm/inp6.mp4
- __MACOSX/CHIMLE_supplementary_materials/website/samples/SR/ddrm/._inp6.mp4
- CHIMLE_supplementary_materials/website/samples/SR/ddrm/inp4.mp4
- __MACOSX/CHIMLE_supplementary_materials/website/samples/SR/ddrm/._inp4.mp4
- CHIMLE_supplementary_materials/website/samples/SR/ddrm/inp5.mp4
- __MACOSX/CHIMLE_supplementary_materials/website/samples/SR/ddrm/._inp5.mp4
- CHIMLE_supplementary_materials/website/samples/SR/ddrm/inp1.mp4
- __MACOSX/CHIMLE_supplementary_materials/website/samples/SR/ddrm/._inp1.mp4
- CHIMLE_supplementary_materials/website/samples/SR/ddrm/inp2.mp4
- __MACOSX/CHIMLE_supplementary_materials/website/samples/SR/ddrm/._inp2.mp4
- CHIMLE_supplementary_materials/website/samples/SR/ddrm/inp3.mp4
- __MACOSX/CHIMLE_supplementary_materials/website/samples/SR/ddrm/._inp3.mp4
- CHIMLE_supplementary_materials/website/samples/SR/msgan/inp6.mp4
- __MACOSX/CHIMLE_supplementary_materials/website/samples/SR/msgan/._inp6.mp4
- CHIMLE_supplementary_materials/website/samples/SR/msgan/inp4.mp4
- __MACOSX/CHIMLE_supplementary_materials/website/samples/SR/msgan/._inp4.mp4
- CHIMLE_supplementary_materials/website/samples/SR/msgan/inp5.mp4
- __MACOSX/CHIMLE_supplementary_materials/website/samples/SR/msgan/._inp5.mp4
- CHIMLE_supplementary_materials/website/samples/SR/msgan/inp1.mp4
- __MACOSX/CHIMLE_supplementary_materials/website/samples/SR/msgan/._inp1.mp4
- CHIMLE_supplementary_materials/website/samples/SR/msgan/inp2.mp4
- __MACOSX/CHIMLE_supplementary_materials/website/samples/SR/msgan/._inp2.mp4
- CHIMLE_supplementary_materials/website/samples/SR/msgan/inp3.mp4
- __MACOSX/CHIMLE_supplementary_materials/website/samples/SR/msgan/._inp3.mp4
- CHIMLE_supplementary_materials/website/samples/SR/rfb-esrgan/.DS_Store
- __MACOSX/CHIMLE_supplementary_materials/website/samples/SR/rfb-esrgan/._.DS_Store
- CHIMLE_supplementary_materials/website/samples/SR/rfb-esrgan/inp6.mp4
- __MACOSX/CHIMLE_supplementary_materials/website/samples/SR/rfb-esrgan/._inp6.mp4
- CHIMLE_supplementary_materials/website/samples/SR/rfb-esrgan/inp4.mp4
- __MACOSX/CHIMLE_supplementary_materials/website/samples/SR/rfb-esrgan/._inp4.mp4
- CHIMLE_supplementary_materials/website/samples/SR/rfb-esrgan/inp5.mp4
- __MACOSX/CHIMLE_supplementary_materials/website/samples/SR/rfb-esrgan/._inp5.mp4
- CHIMLE_supplementary_materials/website/samples/SR/rfb-esrgan/inp1.mp4
- __MACOSX/CHIMLE_supplementary_materials/website/samples/SR/rfb-esrgan/._inp1.mp4
- CHIMLE_supplementary_materials/website/samples/SR/rfb-esrgan/inp2.mp4
- __MACOSX/CHIMLE_supplementary_materials/website/samples/SR/rfb-esrgan/._inp2.mp4
- CHIMLE_supplementary_materials/website/samples/SR/rfb-esrgan/inp3.mp4
- __MACOSX/CHIMLE_supplementary_materials/website/samples/SR/rfb-esrgan/._inp3.mp4
- CHIMLE_supplementary_materials/website/samples/SR/monce/inp6.mp4
- __MACOSX/CHIMLE_supplementary_materials/website/samples/SR/monce/._inp6.mp4
[truncated: 166 more entries]
