# Supplementary material
Source: ML conference proceedings conference paper supplement (https://proceedings.neurips.cc/paper_files/paper/2022/hash/0207c9ea9faf66c6e892c3fa3c167b75-Abstract.html)
Supplement: Supplementary file 1 [file 0207c9ea9faf66c6e892c3fa3c167b75-Supplemental-Conference.zip › CHIMLE_supplementary_materials/Results.html]

CHIMLE


# CHIMLE

A General-purpose Framework for Multimodal Conditional Image Synthesis

Shichong Peng

APEX Lab  
Simon Fraser University

Alireza Moazeni

APEX Lab  
Simon Fraser University

Ke Li

APEX Lab  
Simon Fraser University,  
Google

### Contents

- Overview
- 16x Super-Resolution
- Image Colourization
- Image Decompression
- Night-to-Day
- IMLE vs GAN
- Citation

### Links

Paper

Code

---

## 16x Super-Resolution

We use our method to increase the width and height of input images by a factor of 16x.
Toggle for results from our method (CHIMLE) and those of leading baselines,
including GAN-based general-purpose methods (BicycleGAN,
MSGAN, DivCo
and MoNCE) , diffusion-based general-purpose methods
(DDRM and NDM),
a task specific method (RFB-ESRGAN) and
conditional IMLE (cIMLE).

[
Your browser does not support the video tag.
](./website/samples/SR/CHIMLE/inp2.mp4)

[
Your browser does not support the video tag.
](./website/samples/SR/CHIMLE/inp3.mp4)

[
Your browser does not support the video tag.
](./website/samples/SR/CHIMLE/inp4.mp4)

[
Your browser does not support the video tag.
](./website/samples/SR/CHIMLE/inp5.mp4)

[
Your browser does not support the video tag.
](./website/samples/SR/CHIMLE/inp6.mp4)

[
Your browser does not support the video tag.
](./website/samples/SR/CHIMLE/inp1.mp4)

Input

 BicycleGAN

 MSGAN

 DivCo

 MoNCE

 DDRM

 NDM

 RFB-ESRGAN

 cIMLE

 CHIMLE

---

## Image Colourization

We use our method to colourize a grayscale image.
Toggle for results from our method (CHIMLE) and those of leading baselines, including GAN-based general-purpose methods (BicycleGAN, MSGAN, DivCo and MoNCE) , diffusion-based general-purpose methods (DDRM and NDM), a task specific method (InstColorization) and conditional IMLE (cIMLE).

[
Your browser does not support the video tag.
](./website/samples/Colorization/CHIMLE/inp2.mp4)

[
Your browser does not support the video tag.
](./website/samples/Colorization/CHIMLE/inp3.mp4)

[
Your browser does not support the video tag.
](./website/samples/Colorization/CHIMLE/inp4.mp4)

[
Your browser does not support the video tag.
](./website/samples/Colorization/CHIMLE/inp1.mp4)

Input

 BicycleGAN

 MSGAN

 DivCo

 MoNCE

 DDRM

 NDM

 InstColorization

 cIMLE

 CHIMLE

---

## Image Decompression

We use our method to recover plausible images from a badly compressed image.
Toggle for results from our method (CHIMLE) and those of leading baselines, including GAN-based general-purpose methods (BicycleGAN, MSGAN, DivCo and MoNCE) , diffusion-based general-purpose methods (DDRM and NDM), a task specific method (DnCNN) and conditional IMLE (cIMLE).

[
Your browser does not support the video tag.
](./website/samples/Decompression/CHIMLE/inp2.mp4)

[
Your browser does not support the video tag.
](./website/samples/Decompression/CHIMLE/inp3.mp4)

[
Your browser does not support the video tag.
](./website/samples/Decompression/CHIMLE/inp4.mp4)

[
Your browser does not support the video tag.
](./website/samples/Decompression/CHIMLE/inp1.mp4)

Input

 BicycleGAN

 MSGAN

 DivCo

 MoNCE

 DDRM

 NDM

 DnCNN

 cIMLE

 CHIMLE

---

## Night-to-Day

We use our method to convert a scene at nighttime to daytime.
Toggle for results from our method (CHIMLE) and those of leading baselines, including GAN-based general-purpose methods (BicycleGAN, MSGAN, DivCo and MoNCE) , a diffusion-based general-purpose method (NDM) and conditional IMLE (cIMLE).

[
Your browser does not support the video tag.
](./website/samples/Night2Day/CHIMLE/inp2.mp4)

[
Your browser does not support the video tag.
](./website/samples/Night2Day/CHIMLE/inp3.mp4)

[
Your browser does not support the video tag.
](./website/samples/Night2Day/CHIMLE/inp4.mp4)

[
Your browser does not support the video tag.
](./website/samples/Night2Day/CHIMLE/inp1.mp4)

Input

 BicycleGAN

 MSGAN

 DivCo

 MoNCE

 NDM

 cIMLE

 CHIMLE

---

## IMLE vs GAN

Implicit Maximum Likelihood Estimation (IMLE) trains a
generator without a discriminator. Below is a conceptual illustration of how IMLE works.

[

Your browser does not support the video tag.
](./website/imle.mp4)

Compared to GANs, IMLE has two key differences:
it avoids mode collapse and training instability.
The animation below shows what happens when training a GAN.

[

Your browser does not support the video tag.
](./website/GAN_alg.mp4)

As shown above, a GAN encourages **every** *generated sample* to be similar to **some** *real data points*.
On the other hand, IMLE flips the direction: it instead ensures ***every*** *real data point* has ***some*** similar *generated samples*.

#### Mode Collapse

Below is a comparison of the behaviours of GAN and IMLE over the course of training.
Real data points are shown as blue crosses and the probability density of generated samples is shown as a heatmap.

[

Your browser does not support the video tag.
](./website/gan.mp4)

GAN

[

Your browser does not support the video tag.
](./website/i.mp4)

IMLE

As shown above, the GAN usually generates data points at the bottom and largely ignores the data points at
the top. In comparison, IMLE can generate all data points with similar frequency.

#### Stable Training

Because IMLE uses a non-adversarial objective, it trains stably.

[

Your browser does not support the video tag.
](./website/stable.mp4)

The output is shown on the left and the loss over time is shown on the right.
The output quality improves steadily over the course of training.

---

## Citation

```
@inproceedings{peng2022chimle,
   title={CHIMLE: Conditional Hierarchical IMLE for Multimodal Conditional Image Synthesis},
   author={Shichong Peng and Alireza Moazeni and Ke Li},
   booktitle={Advances in Neural Information Processing Systems},
   year={2022}
}
```
