# Supplementary material
Source: ML conference proceedings conference paper supplement (https://proceedings.neurips.cc/paper_files/paper/2022/hash/0207c9ea9faf66c6e892c3fa3c167b75-Abstract.html)

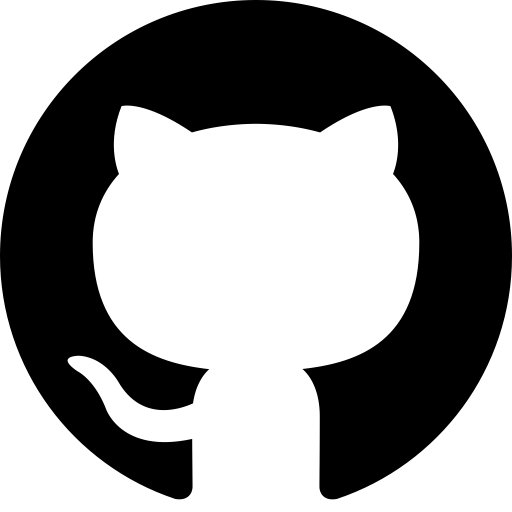

Supplement: Supplementary file 1 [file 0207c9ea9faf66c6e892c3fa3c167b75-Supplemental-Conference.zip › CHIMLE_supplementary_materials/website/github.jpg]

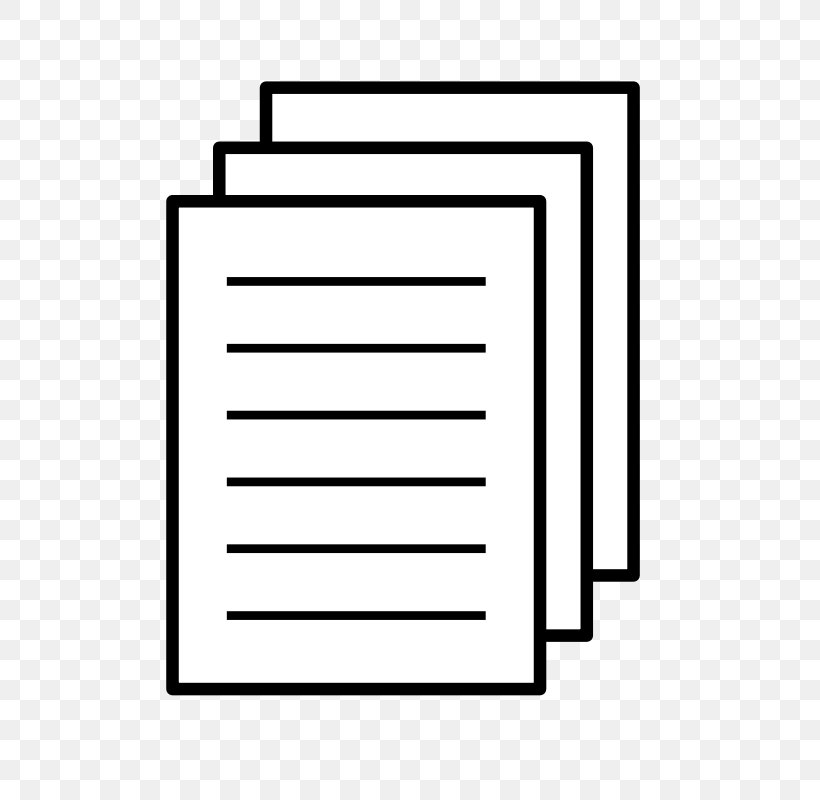

Supplement: Supplementary file 1 [file 0207c9ea9faf66c6e892c3fa3c167b75-Supplemental-Conference.zip › CHIMLE_supplementary_materials/website/paper_icon.jpg]
